# Supplementary material for: Development of a Gene Delivery System of Oligonucleotides for Fibroses by Targeting Cell-Surface Vimentin-Expressing Cells with N-Acetylglucosamine-Bearing Polymer-Conjugated Polyethyleneimine
Source: PubMed Central journal article supplement (PMC7407634; doi:10.3390/polym12071508), 2020-07-07
Supplement: polymers-12-01508-s001.pdf [file polymers-12-01508-s001.pdf]

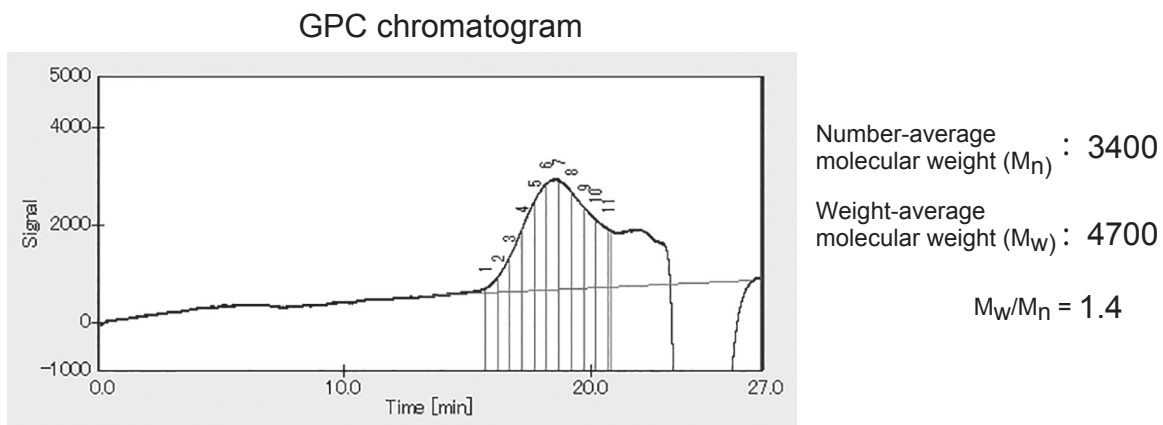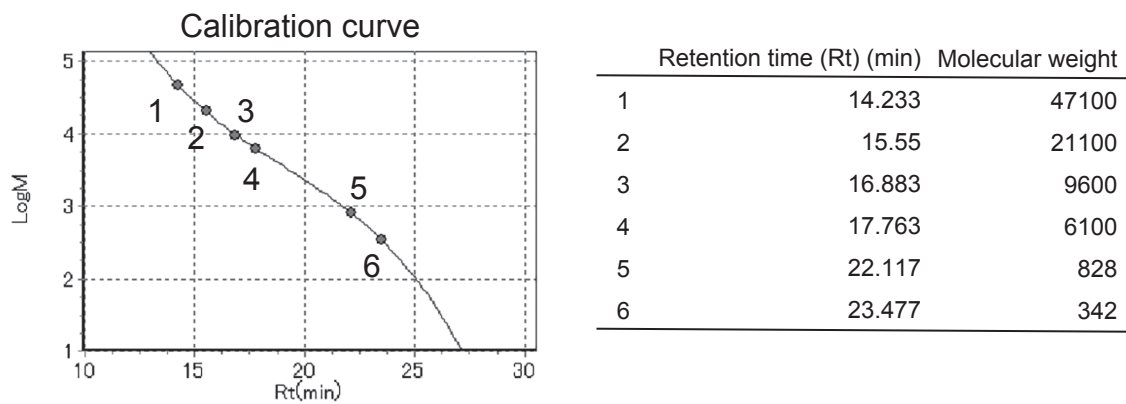

Figure S1: GPC chromatogram of AC-GlcNAc. Calibration curve was produced based on a pullulan standard.

### AC-GlcNAc-conjugated PEI (1 : 5)

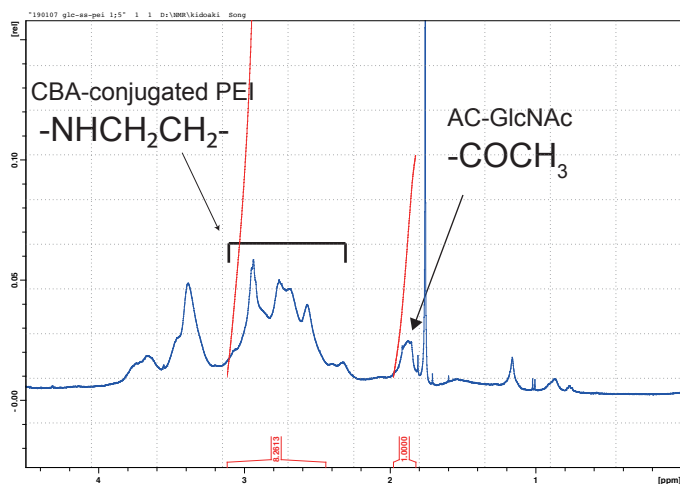

### AC-GlcNAc-conjugated PEI (1 : 10)

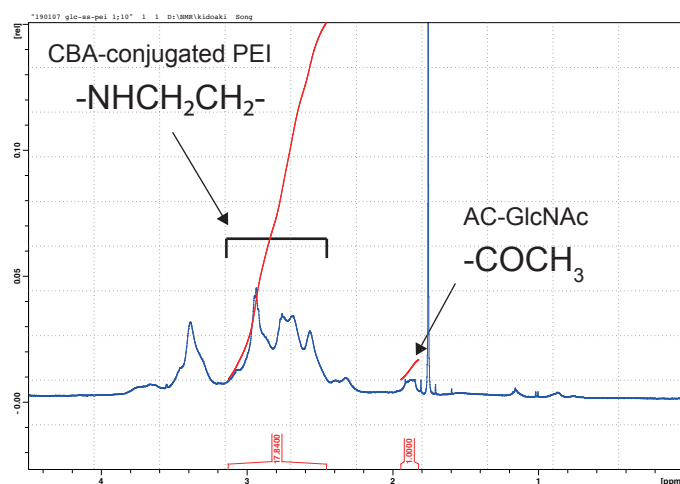

### AC-GlcNAc-conjugated PEI (1 : 20)

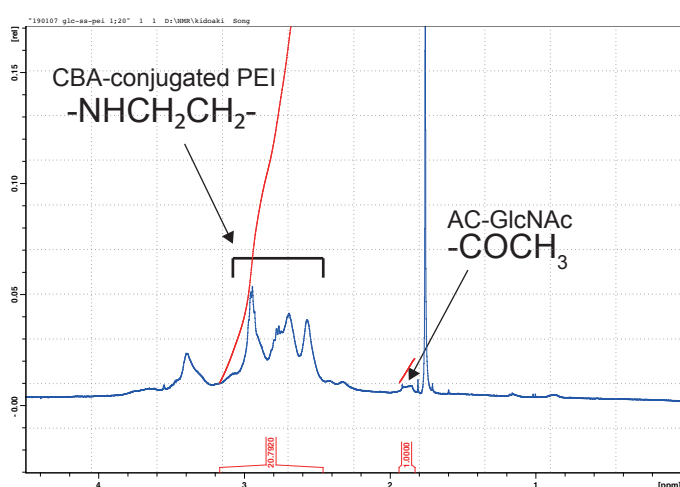

Figure S2: Nuclear magnetic resonance charts of AC-GlcNAc-conjugated polyethyleneimine (PEI) (1:5, 1:10, and 1:20).

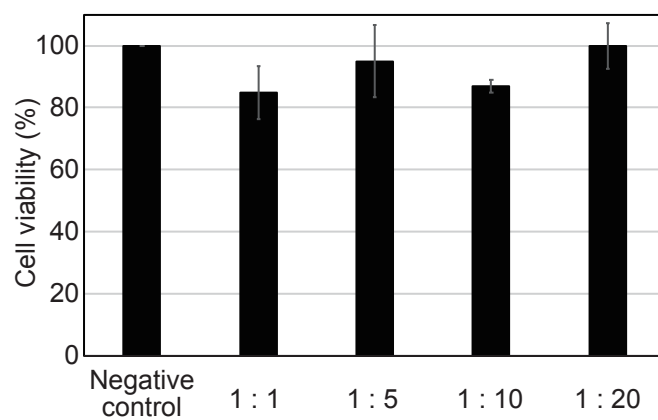

Figure S3: Evaluation of cell viability (%) of normal human dermal fibroblasts (NHDFs) after treatment with AC-GlcNAc-conjugated polyethylenimine (PEI) complexes (1:1, 1:5, 1:10, and 1:20) based on a CCK-8 assay. n = 6
